# Supplementary material for: Classical and adaptive control of ex vivo skeletal muscle contractions using Functional Electrical Stimulation (FES)
Source: PubMed Central journal article supplement (PMC5342220; doi:10.1371/journal.pone.0172761), 2017-03-08
Supplement: pone.0172761.s001.pdf [file pone.0172761.s001.pdf]

**S1 Table. Nomenclature describing definitions of variables.**

|                      |                                                                  |
|----------------------|------------------------------------------------------------------|
| $a$                  | Unknown state constant                                           |
| $a_r$                | Reference model state constant                                   |
| $A_r$                | Known state matrix                                               |
| $b$                  | Unknown input constant of known sign                             |
| $b_r$                | Reference model input constant                                   |
| $c$                  | Damping coefficient                                              |
| $e_{ad}(t)$          | Error of $x(t)$ relative to $x_r(t)$ for MRAC                    |
| $e_{PI}(t)$          | Error of $x(t)$ relative to $x_d(t)$ for PI Control              |
| $e_a(t)$             | Error dynamics of the Adaptive Augmented PI Controller           |
| $F_f$                | Coulomb frictional force                                         |
| $F^{MT}$             | Muscle-tendon force                                              |
| $\gamma_x, \gamma_r$ | MRAC tuning parameter constants                                  |
| $\Gamma_K, \Gamma_W$ | Adaptive Augmented PI Controller adaptation gains                |
| $k_I$                | Integral Gain for PI Control                                     |
| $k_P$                | Proportional Gain for PI Control                                 |
| $K^*$                | Matrix containing integral and proportional gains for PI Control |
| $\tilde{K}(t)$       | Approximation error between the estimate and ideal values of $K$ |
| $\hat{K}(t)$         | Estimate of $K$                                                  |
| $k_s$                | Spring constant                                                  |
| $l_M$                | Muscle length                                                    |
| $l_0^M$              | Maximum optimal fiber length at resting tension                  |
| $l_{MT}$             | Muscle-tendon length                                             |
| $l_s^T$              | Tendon slack length                                              |
| $\lambda^*$          | Constant of known sign and unknown magnitude                     |
| $m$                  | Mass of the setup                                                |
| MRAC                 | Model Reference Adaptive Control                                 |
| $P$                  | Positive definite matrix that satisfies the Lyapunov equation    |
| PI                   | Proportional Integral                                            |
| $\phi(x(t))$         | Known vector of nonlinear functions                              |
| $r(t)$               | Reference Input                                                  |
| $T_i$                | Integral Time                                                    |

|                                            |                                                                  |
|--------------------------------------------|------------------------------------------------------------------|
| $\theta_x^*, \theta_r^*$                   | Ideal controller gains for MRAC                                  |
| $\theta_x(t), \theta_r(t)$                 | Adaptive controller gain for MRAC                                |
| $\tilde{\theta}_x(t), \tilde{\theta}_r(t)$ | Difference between adaptive and ideal gain                       |
| $u(t)$                                     | Control effort                                                   |
| $u_{ad}(t)$                                | MRAC control input effort                                        |
| $u_{id}(t)$                                | Ideal MRAC control input effort                                  |
| $u_{PI}(t)$                                | PI control input effort                                          |
| $V(t)$                                     | Lyapunov function                                                |
| $W^*$                                      | Vector of nonlinear function weights                             |
| $\tilde{W}(t)$                             | Approximation error between the estimate and ideal values of $W$ |
| $\hat{W}(t)$                               | Estimate of $W$                                                  |
| $x(t)$                                     | System state                                                     |
| $x_a(t)$                                   | Augmented system state                                           |
| $x_d(t)$                                   | Desired Trajectory                                               |
| $x_I(t)$                                   | Integral state of PI Control                                     |
| $x_{lin}(t)$                               | Reference model state for Adaptive Augmented PI controller       |
| $x_r(t)$                                   | Reference model state for MRAC                                   |
