# Supplementary material for: Classical and adaptive control of ex vivo skeletal muscle contractions using Functional Electrical Stimulation (FES)
Source: PubMed Central journal article supplement (PMC5342220; doi:10.1371/journal.pone.0172761), 2017-03-08
Supplement: pone.0172761.s003.pdf [file pone.0172761.s003.pdf]

**S2 Table. Thelen Muscle Parameters for the Skeletal Muscle Model.** These parameters were used for simulations of the EDL mouse muscle model.

|                                            |                       |                         |
|--------------------------------------------|-----------------------|-------------------------|
| Muscle Length                              | $l_M$                 | 0.0117 m                |
| Optimal isometric force                    | $F_0^M$               | 0.507 N                 |
| Maximum optimal fiber length               | $l_0^M$               | $0.44l_M$ m             |
| Tendon slack length                        | $l_s^T$               | 0.0129 m                |
| Passive muscle strain                      | $\varepsilon_0^M$     | 0.006                   |
| Passive F-L shape factor                   | $k_{PE}$              | 4.0                     |
| Exponential shape factor                   | $k_{toe}$             | 3                       |
| Tendon strain due to $F_0^M$               | $\varepsilon_0^T$     | 0.033                   |
| Linear shape factor                        | $k_{lin}$             | $1.712/\varepsilon_0^T$ |
| Tendon strain (linear)                     | $\varepsilon_{toe}^T$ | $0.609\varepsilon_0^T$  |
| Normalized tendon force (linear)           | $\bar{F}_{toe}^T$     | 0.333333                |
| Shape factor for the Gaussian active F-L   | $\gamma$              | 0.5                     |
| Shape factor for the F-V                   | $A_f$                 | 0.3                     |
| Normalized muscle force during lengthening | $\bar{F}_{len}^M$     | 1.8                     |
