# Supplementary material for: Classical and adaptive control of ex vivo skeletal muscle contractions using Functional Electrical Stimulation (FES)
Source: PubMed Central journal article supplement (PMC5342220; doi:10.1371/journal.pone.0172761), 2017-03-08

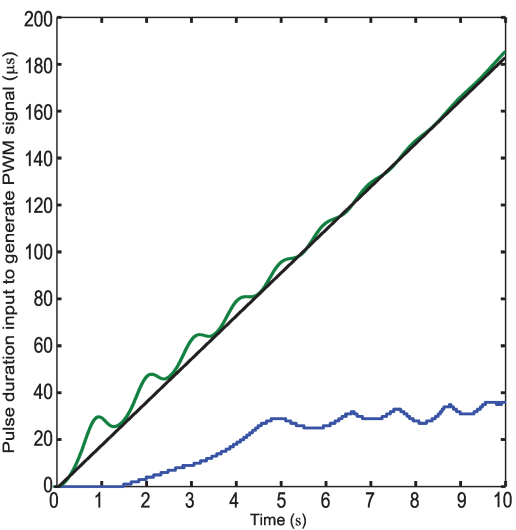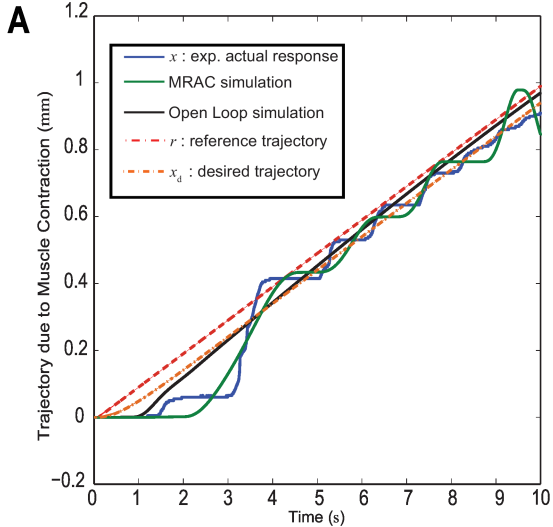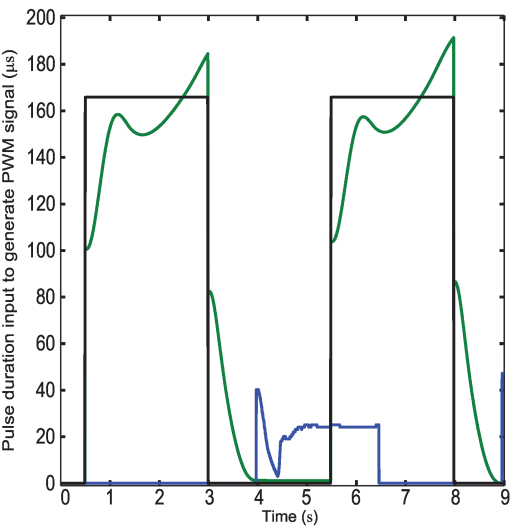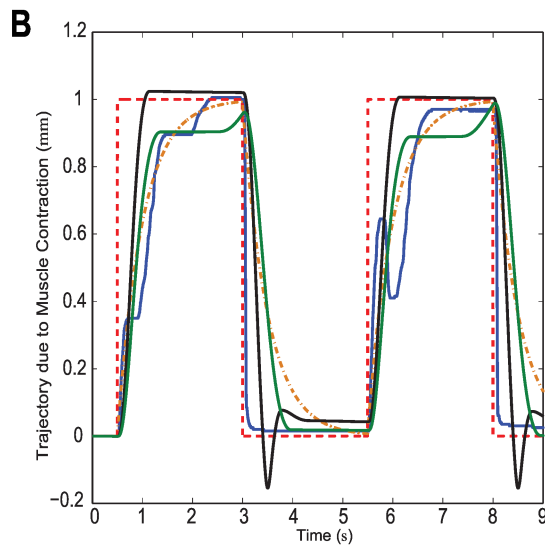

Supplement: pone.0172761.s010.pdf [file pone.0172761.s010.pdf]
